# Supplementary material
Source: MDPI journal article supplement (https://www.mdpi.com/2071-1050/13/18/10429)
Supplement: s1 [file s1 › sustainability-1359334-supplementary.pdf]

## SUPPLEMENTARY MATERIAL

The Supplementary Material is divided in two items (SMI and SMII).

### SMI – Materials and Methods

Part of data used in Materials and Methods are presented in Tables S1 – S3.

**Table S1.** Datasets used in the Life cycle GHG emissions inventory.

| Materials production |                                                                                                                                     |
|----------------------|-------------------------------------------------------------------------------------------------------------------------------------|
| Cement               | Cement, limestone 6-10% {BR}   market for cement, limestone 6-10%   Cut-off, U                                                      |
| Fly ash              | Supplementary cementitious materials {BR}   market for supplementary cementitious materials   Cut-off, U                            |
| Hydrated lime        | Lime, hydrated, packed {BR}   market for lime, hydrated, packed   Cut-off, U                                                        |
| Metakaolin           | Calcined clay {BR}   market for calcined clay   Cut-off, U                                                                          |
| Earth                | Clay {RoW}   market for clay   Cut-off, U                                                                                           |
| Sand                 | Sand {BR}   market for sand   Cut-off, U                                                                                            |
| Water                | Tap water {BR}   market for tap water   Cut-off, U                                                                                  |
| Calcium chloride     | Calcium chloride {RoW}   market for calcium chloride   Cut-off, U                                                                   |
| Plasticiser          | Plasticiser, for concrete, based on sulfonated melamine formaldehyde {GLO}   market for   Cut-off, U                                |
| Transportation       |                                                                                                                                     |
| Transportation       | Transport, freight, lorry 16-32 metric ton, euro3 {RoW}   market for transport, freight, lorry 16-32 metric ton, EURO3   Cut-off, U |
| Energy and fuels     |                                                                                                                                     |
| Electricity          | Electricity, medium voltage <sup>1</sup> {BR}   market group for electricity, medium voltage   Cut-off, U                           |
| Diesel               | Diesel, burned in building machine {GLO}   market for   Cut-off, U                                                                  |
| Waste Disposal       |                                                                                                                                     |
| Inert landfill       | Process-specific burdens, inert material landfill {RoW}   market for process-specific burdens, inert material landfill   Cut-off, U |

<sup>1</sup> It was adapted for two years according with data of on González-Mahecha et al. [33].

**Table S2.** Transportation distances.

| Materials        | Distance (km) |
|------------------|---------------|
| Earth            | 10            |
| Cement           | 100           |
| Hydrated lime    | 100           |
| Metakaolin       | 200           |
| Fly ash          | 400           |
| Sand             | 30            |
| Bamboo particles | 200           |

|                      |                      |
|----------------------|----------------------|
| Calcium Chloride     | 400                  |
| Plasticiser          | 400                  |
| <b>Other</b>         | <b>Distance (km)</b> |
| Building to landfill | 50                   |

Table S3. Annual Electricity consumption for building.

| Wall substrate        | Options <sup>1</sup> | Cfb — Temperate/meso-thermal climate<br>(kWh/building) | Aw — Tropical savanna climate with dry-winter<br>(kWh/building) | Am — Tropical monsoon climate<br>(kWh/building) |
|-----------------------|----------------------|--------------------------------------------------------|-----------------------------------------------------------------|-------------------------------------------------|
| Concrete wall         | EMB0 — 3             | 1163.8                                                 | 5661.7                                                          | 3487.8                                          |
|                       | EMB3 — 3             | 1155.6                                                 | 5637.1                                                          | 3489.5                                          |
|                       | EMB6 — 3             | 1161.1                                                 | 5636.9                                                          | 3453.7                                          |
|                       | EMB9 — 3             | 1149.5                                                 | 5644.9                                                          | 3451.3                                          |
|                       | CMS — 3              | 1186.1                                                 | 5729.8                                                          | 3489.5                                          |
|                       | EMB0 — 5             | 1073.5                                                 | 5287.6                                                          | 3247.1                                          |
|                       | EMB3 — 5             | 1059.3                                                 | 5242.4                                                          | 3245.1                                          |
|                       | EMB6 — 5             | 1065.1                                                 | 5172.5                                                          | 3207.2                                          |
|                       | EMB9 — 5             | 1050.0                                                 | 5078.5                                                          | 3213.9                                          |
|                       | CMS — 5              | 1099.5                                                 | 5474.6                                                          | 3286.4                                          |
| Ceramic block masonry | EMB0 — 3             | 1210.0                                                 | 5816.0                                                          | 3476.8                                          |
|                       | EMB3 — 3             | 1209.6                                                 | 5765.6                                                          | 3473.4                                          |
|                       | EMB6 — 3             | 1188.0                                                 | 5757.3                                                          | 3455.7                                          |
|                       | EMB9 — 3             | 1188.0                                                 | 5733.8                                                          | 3442.7                                          |
|                       | CMS — 3              | 1208.1                                                 | 5792.3                                                          | 3489.7                                          |
|                       | EMB0 — 5             | 1070.3                                                 | 5427.1                                                          | 3257.6                                          |
|                       | EMB3 — 5             | 1069.3                                                 | 5443.7                                                          | 3251.2                                          |
|                       | EMB6 — 5             | 1066.6                                                 | 5372.1                                                          | 3260.0                                          |
|                       | EMB9 — 5             | 1053.4                                                 | 5343.1                                                          | 3258.2                                          |
|                       | CMS — 5              | 1077.6                                                 | 5427.8                                                          | 3340.5                                          |

<sup>1</sup>3 – plaster thickness of 3 cm. 5 - plaster thickness of 5 cm

## SMII — Results

Part of the results are presented in Figures S1–S4, considering two replacements of EMBs.

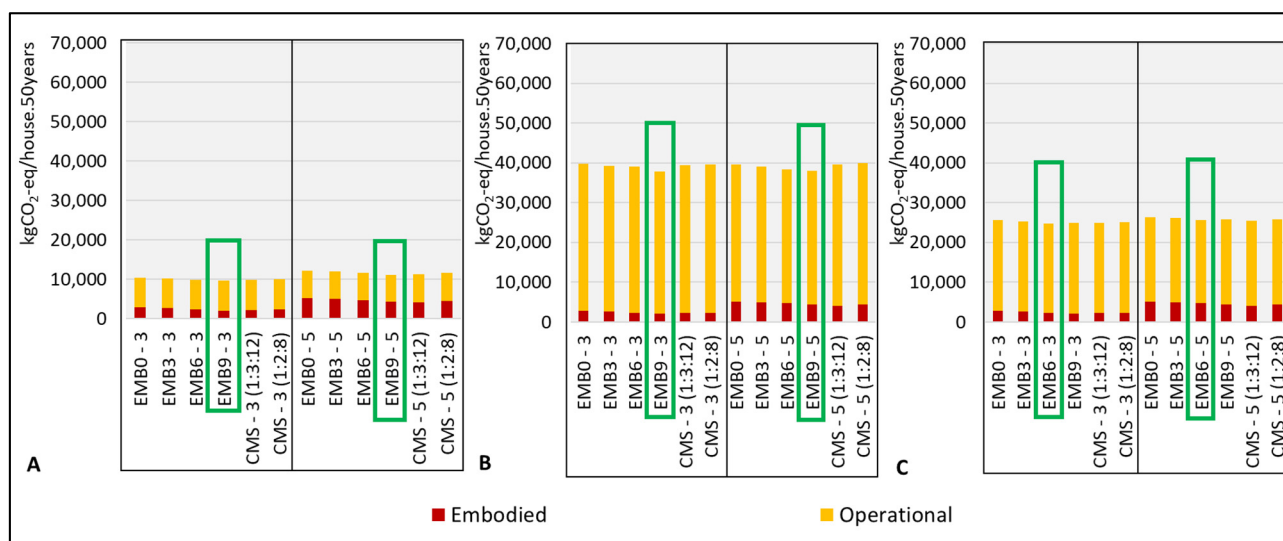

**Figure S1.** Total GHG emissions (embodied and operational) of all cases considering a concrete wall substrate and mortar thickness of 3 cm and 5 cm and EF<sub>min</sub> = 0.130 kgCO<sub>2</sub>-eq/kWh. (A) Cfb — Temperate/mesothermal climate. (B) Aw — Tropical savanna climate with dry-winter. (C) Am — Tropical monsoon climate. EMB — Earth mortar. CMS — Conventional, mortar. The green rectangles represent the option with smaller GHG emissions.

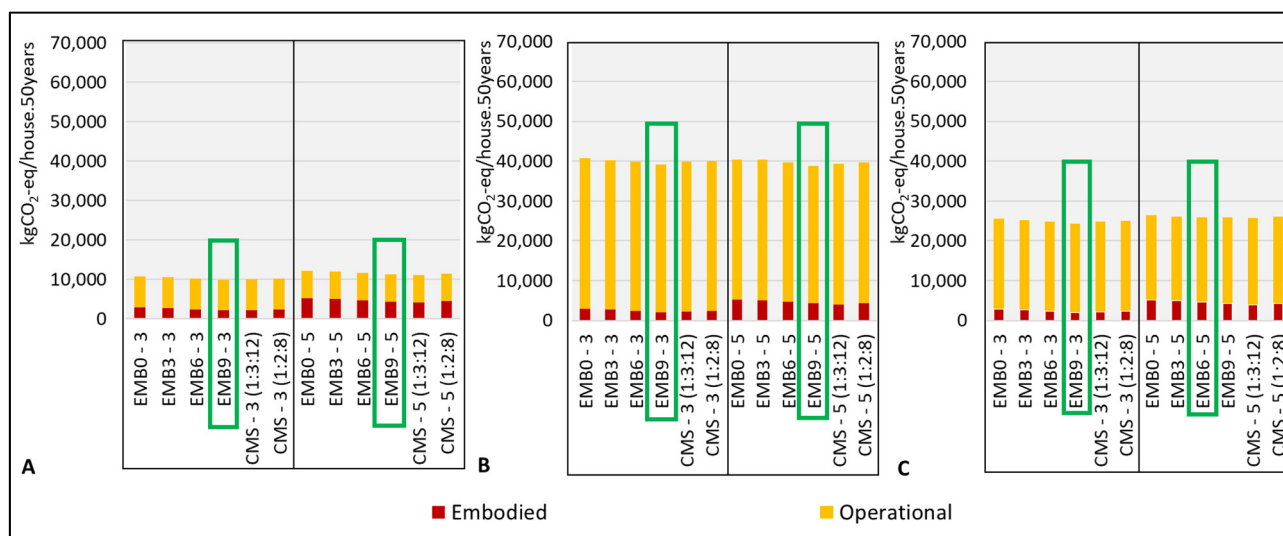

**Figure S2.** Total GHG emissions (embodied and operational) of all cases considering a concrete block masonry substrate and mortar thickness of 3 cm and 5 cm EF<sub>min</sub> = 0.130 kgCO<sub>2</sub>-eq/kWh. (A) Cfb — Temperate/mesothermal climate. (B) Aw — Tropical savanna climate with dry-winter. (C) Am — Tropical monsoon climate. EMB — Earth mortar. CMS — Conventional, mortar. The green rectangles represent the option with smaller GHG emissions.

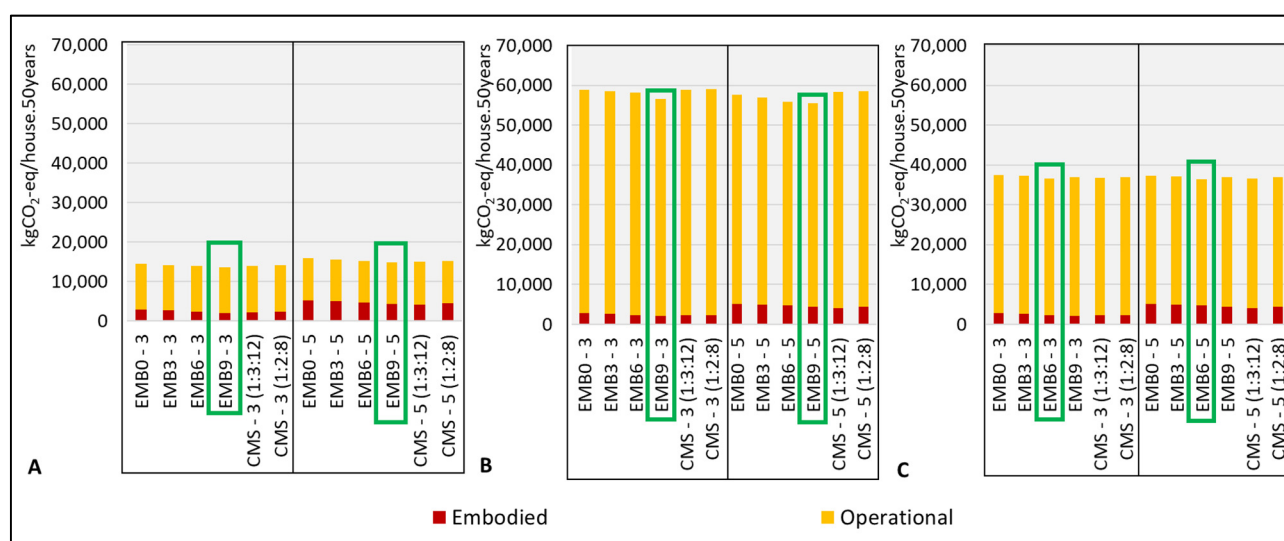

**Figure S3.** Total GHG emissions (embodied and operational) of all cases considering a concrete wall substrate and mortar thickness of 3 cm and 5 cm and EFmax = 0.198 kgCO<sub>2</sub>-eq/kWh. (A) Cfb — Temperate/mesothermal climate. (B) Aw — Tropical savanna climate with dry-winter. (C) Am — Tropical monsoon climate. EMB — Earth mortar. CMS — Conventional, mortar. The green rectangles represent the option with smaller GHG emissions.

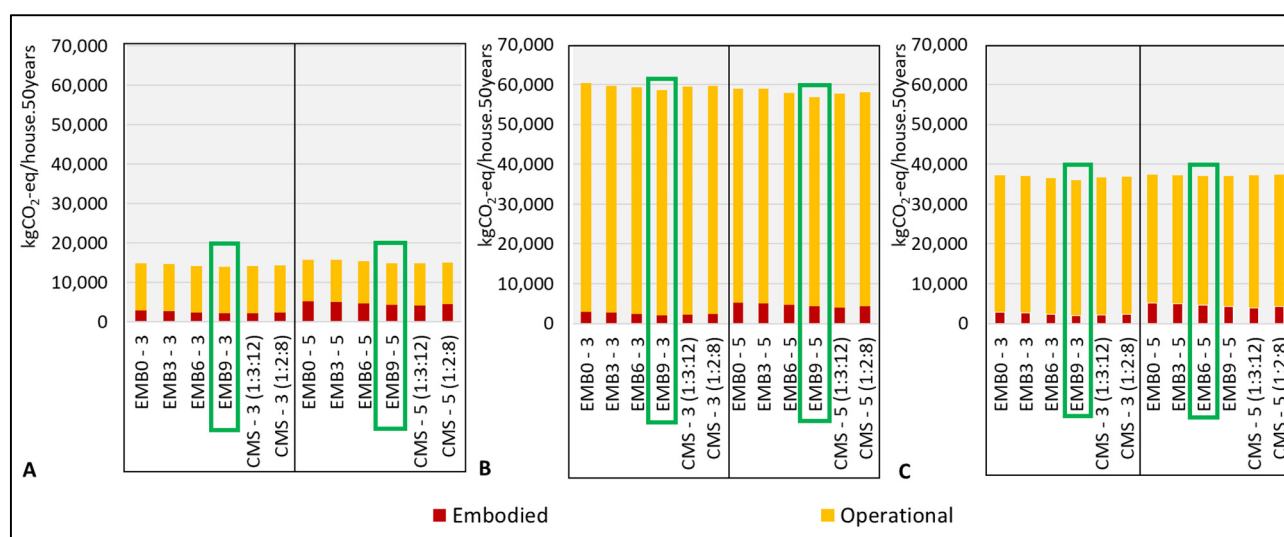

**Figure S4.** Total GHG emissions of all cases considering a concrete block masonry and mortar thickness of 3 cm and 5 cm. EFmax = 0.198 kgCO<sub>2</sub>-eq/kWh. (A) Cfb — Temperate/mesothermal climate. (B) Aw — Tropical savanna climate with dry-winter. (C) Am — Tropical monsoon climate. EMB — Earth mortar. CMS — Conventional, mortar. The green rectangles represent the option with smaller GHG emissions.
